# Supplementary material
Source: PubMed Central journal article supplement (PMC7705418)
Supplement: mmc1.pdf [file mmc1.pdf]

Table S1 Scores of depression, anxiety, and insomnia measurements in the total population and different subgroups. HCW: health care workers, NHCW: non-health care workers

| Scale | Total score,<br>median (IQR) | Stages, median (IQR) |           |        | Gender, median (IQR) |         |        | Location, median (IQR) |                           |                    |        | Occupation, median (IQR) |         |        |
|-------|------------------------------|----------------------|-----------|--------|----------------------|---------|--------|------------------------|---------------------------|--------------------|--------|--------------------------|---------|--------|
|       |                              | Outbreak             | Remission | p      | Male                 | Female  | p      | Wuhan                  | Hubei other<br>than Wuhan | Other<br>provinces | p      | HCWs                     | NHCWs   | p      |
| PHQ-9 | 5(2-9)                       | 5(2-9)               | 6(2-11)   | 0.005  | 4(1-8)               | 5(2-10) | <0.001 | 5(2-9)                 | 5(2-10)                   | 4(1-9)             | 0.001  | 5(2-9)                   | 6(2-11) | <0.001 |
| GAD-7 | 4(1-9)                       | 4(1-7)               | 5(1-8)    | 0.149  | 3(0-7)               | 4(1-8)  | <0.001 | 5(1-8)                 | 3(1-7)                    | 3(0-7)             | <0.001 | 4(1-7)                   | 4(1-8)  | 0.002  |
| ISI   | 4(1-8)                       | 4(1-8)               | 6(2-10)   | <0.001 | 4(1-8)               | 5(1-9)  | 0.002  | 5(1-9)                 | 4(1-9)                    | 0(1-9)             | <0.001 | 4(1-8)                   | 5(2-10) | <0.001 |

Table S2 Factors associated with psychological problems in healthcare workers versus nonhealthcare workers.

| Characteristic                                  | Depression |                  | Anxiety |                  | Insomnia |                   |
|-------------------------------------------------|------------|------------------|---------|------------------|----------|-------------------|
|                                                 | p          | OR (95% CI)      | p       | OR (95% CI)      | p        | OR (95% CI)       |
| <i>Healthcare workers</i>                       |            |                  |         |                  |          |                   |
| Gender                                          |            |                  |         |                  |          |                   |
| Female                                          | <0.001     | 1.73(1.39, 2.15) | 0.001   | 1.44(1.15, 1.80) |          |                   |
| Male                                            | 1          |                  | 1       |                  |          |                   |
| Dwelling state                                  |            |                  |         |                  |          |                   |
| Living alone                                    | <0.001     | 1.71(1.39, 2.09) | 0.003   | 1.40(1.12, 1.75) | 0.004    | 1.57(1.15, 2.14)  |
| Living together                                 | 1          |                  | 1       |                  | 1        |                   |
| Having organic disease                          |            |                  |         |                  |          |                   |
| Yes                                             | <0.001     | 1.89(1.40, 2.56) | <0.001  | 2.35(1.71, 3.22) | <0.001   | 2.81(1.96, 4.03)  |
| No                                              | 1          |                  | 1       |                  | 1        |                   |
| City with over 1000 confirmed cases (yes vs no) |            |                  |         |                  |          |                   |
| Yes                                             | 0.03       | 1.26(1.03, 1.54) |         |                  |          |                   |
| No                                              | 1          |                  |         |                  |          |                   |
| Personal infection                              |            |                  |         |                  |          |                   |
| Confirmed                                       | 0.033      | 1.87(1.05, 3.31) | <0.001  | 3.05(1.84, 5.05) | <0.001   | 3.46(1.84, 6.50)  |
| Suspected                                       | <0.001     | 4.13(2.19, 7.79) | <0.001  | 3.07(1.83, 5.13) | <0.001   | 4.71(2.10, 10.60) |
| Quarantine                                      | <0.001     | 2.56(1.80, 3.63) | <0.001  | 3.11(2.16, 4.48) | <0.01    | 2.36(1.37, 4.07)  |
| Close contactor                                 | <0.001     | 1.70(1.32, 2.21) | 0.061   | 1.33(0.99, 1.78) | <0.01    | 1.65(1.16, 2.36)  |
| No                                              | 1          |                  | 1       |                  | 1        |                   |
| <i>Non-healthcare workers</i>                   |            |                  |         |                  |          |                   |
| Gender                                          |            |                  |         |                  |          |                   |

|                            |        |                  |        |                  |        |                  |
|----------------------------|--------|------------------|--------|------------------|--------|------------------|
| Female                     | <0.001 | 1.58(1.29, 1.94) |        |                  |        |                  |
| Male                       | 1      |                  |        |                  |        |                  |
| Living state               |        |                  |        |                  |        |                  |
| Living alone               | 0.003  | 1.47(1.14, 1.91) |        |                  | <0.001 | 2.05(1.48, 2.82) |
| Living together            | 1      |                  |        |                  | 1      |                  |
| Having organic diseases    |        |                  |        |                  |        |                  |
| Yes                        | <0.001 | 2.08(1.64, 2.65) | <0.001 | 2.27(1.76, 2.92) | <0.001 | 2.04(1.51, 2.77) |
| No                         | 1      |                  | 1      |                  | 1      |                  |
| Marital status             |        |                  |        |                  |        |                  |
| Single                     | <0.001 | 2.54(1.25, 5.17) | <0.001 | 4.53(2.24, 9.15) | 0.02   | 1.42(1.06, 1.90) |
| Married                    | 1      |                  | 1      |                  | 1      |                  |
| Education level            |        |                  |        |                  |        |                  |
| Senior highschool or lower |        |                  |        |                  | <0.001 | 1.69(1.27, 2.24) |
| College or higher          |        |                  |        |                  | 1      |                  |
| Personal infection         |        |                  |        |                  |        |                  |
| Confirmed                  | 0.041  | 0.56(0.32, 0.98) | 0.26   | 0.72(0.40, 1.28) | 0.8    | 0.92(0.48, 1.76) |
| Suspected                  | 0.122  | 1.90(0.84, 4.29) | 0.071  | 2.17(0.94, 5.02) | 0.02   | 2.84(1.18, 6.85) |
| Quarantine                 | 0.168  | 1.49(0.85, 2.62) | 0.003  | 2.32(1.32, 4.08) | 0.082  | 1.80(0.93, 3.49) |
| Close contactor            | 0.01   | 2.54(1.25, 5.17) | <0.001 | 4.53(2.24, 9.15) | 0.229  | 1.71(0.72, 4.07) |
| No                         | 1      |                  | 1      |                  | 1      |                  |

Table S3 Factors associated with psychological problems in three age groups.

| characteristic          | Depression |                   | Anxiety |                   | Insomnia |                    |
|-------------------------|------------|-------------------|---------|-------------------|----------|--------------------|
|                         | p          | OR (95% CI)       | p       | OR (95% CI)       | p        | OR (95% CI)        |
| < 25 years old          |            |                   |         |                   |          |                    |
| Gender                  |            |                   |         |                   |          |                    |
| Females                 | <0.001     | 1.92(1.45, 2.55)  |         |                   |          |                    |
| Males                   | 1          |                   |         |                   |          |                    |
| Dwelling state          |            |                   |         |                   |          |                    |
| Living alone            |            |                   |         |                   | <0.001   | 2.22(1.51, 3.24)   |
| Living together         |            |                   |         |                   | 1        |                    |
| Having organic diseases |            |                   |         |                   |          |                    |
| Yes                     | <0.001     | 3.05(2.02, 4.60)  | <0.001  | 3.74(2.49, 5.62)  | 0.001    | 2.37(1.44, 3.90)   |
| No                      | 1          |                   | 1       |                   | 1        |                    |
| Occupation              |            |                   |         |                   |          |                    |
| Nonhealthcare workers   | <0.001     | 2.20(1.64, 2.95)  | <0.001  | 1.92(1.38, 2.68)  | 0.046    | 1.52(1.01, 2.29)   |
| Healthcare workers      | 1          |                   | 1       |                   | 1        |                    |
| Marital status          |            |                   |         |                   |          |                    |
| Single                  | 0.005      | 1.47(1.12, 1.93)  |         |                   |          |                    |
| Married                 | 1          |                   |         |                   |          |                    |
| Personal infection      |            |                   |         |                   |          |                    |
| Confirmed               | 0.811      | 1.12(0.45, 2.79)  | 0.083   | 2.21(0.90, 5.44)  | 0.223    | 1.93(0.67, 5.54)   |
| Suspected               | <0.001     | 7.84(2.83, 21.78) | 0.005   | 3.98(1.53, 10.32) | <0.001   | 15.15(4.59, 49.98) |
| Quarantine              | 0.001      | 2.69(1.46, 4.95)  | <0.001  | 4.04(2.18, 7.49)  | 0.005    | 3.07(1.40, 6.74)   |
| Close contactor         | 0.017      | 1.75(1.10, 2.79)  | 0.024   | 1.81(1.08, 3.02)  | 0.137    | 1.63(0.86, 3.08)   |
| No                      | 1          |                   | 1       |                   | 1        |                    |

|                                         |        |                  |        |                  |        |                  |
|-----------------------------------------|--------|------------------|--------|------------------|--------|------------------|
| 25-45 years old                         |        |                  |        |                  |        |                  |
| Stage of the COVID-19 epidemic in China |        |                  |        |                  |        |                  |
| Remission                               |        |                  | 0.012  | 1.36(1.07, 1.73) |        |                  |
| Outbreak                                |        |                  | 1      |                  |        |                  |
| Gender                                  |        |                  |        |                  |        |                  |
| Females                                 | <0.001 | 1.50(1.24, 1.81) | 0.039  | 1.24(1.01, 1.52) |        |                  |
| Males                                   | 1      |                  | 1      |                  |        |                  |
| Dwelling state                          |        |                  |        |                  |        |                  |
| Living alone                            | <0.001 | 1.80(1.47, 2.21) |        |                  |        |                  |
| Living together                         | 1      |                  |        |                  |        |                  |
| Having organic diseases                 |        |                  |        |                  |        |                  |
| Yes                                     | <0.001 | 2.01(1.53, 2.64) | <0.001 | 2.33(1.75, 3.11) | <0.001 | 2.71(1.96, 3.76) |
| No                                      | 1      |                  | 1      |                  | 1      |                  |
| Occupation                              |        |                  |        |                  |        |                  |
| Nonhealthcare workers                   | <0.001 | 1.84(1.50, 2.26) | <0.001 | 1.63(1.30, 2.06) |        |                  |
| Healthcare workers                      | 1      |                  | 1      |                  |        |                  |
| Education level                         |        |                  |        |                  |        |                  |
| Senior highschool or lower              |        |                  |        |                  | 0.001  | 1.85(1.28, 2.66) |
| College or higher                       |        |                  |        |                  | 1      |                  |
| Living area                             |        |                  |        |                  |        |                  |
| In Wuhan                                |        |                  |        |                  | 0.001  | 1.57(1.21, 2.02) |

|                            |        |                  |        |                  |        |                  |
|----------------------------|--------|------------------|--------|------------------|--------|------------------|
| Other than Wuhan           |        |                  |        |                  | 1      |                  |
| Personal infection         |        |                  |        |                  |        |                  |
| Confirmed                  | 0.05   | 1.72(1.00, 2.97) | 0.001  | 2.66(1.53, 4.64) |        |                  |
| Suspected                  | 0.046  | 1.77(1.01, 3.12) | <0.001 | 2.94(1.68, 5.16) |        |                  |
| Quarantine                 | 0.009  | 1.66(1.13, 2.42) | <0.001 | 2.48(1.69, 3.64) |        |                  |
| Close contactor            | 0.009  | 1.47(1.10, 1.95) | 0.102  | 1.31(0.95, 1.81) |        |                  |
| No                         | 1      |                  | 1      |                  |        |                  |
| >45 years old              |        |                  |        |                  |        |                  |
| Dwelling state             |        |                  |        |                  |        |                  |
| Living alone               | <0.001 | 2.55(1.59, 4.08) | <0.001 | 2.68(1.66, 4.34) | 0.001  | 2.73(1.53, 4.86) |
| Living together            | 1      |                  | 1      |                  | 1      |                  |
| Having organic diseases    |        |                  |        |                  |        |                  |
| Yes                        | <0.001 | 2.36(1.61, 3.45) | 0.009  | 1.72(1.15, 2.59) | 0.026  | 1.72(1.07, 2.77) |
| No                         | 1      |                  | 1      |                  | 1      |                  |
| Education level            |        |                  |        |                  |        |                  |
| Senior highschool or lower |        |                  |        |                  | <0.001 | 2.87(1.82, 4.54) |
| College or higher          |        |                  |        |                  | 1      |                  |
| Occupation                 |        |                  |        |                  |        |                  |
| Nonhealthcare workers      |        |                  | 0.014  | 1.77(1.12, 2.77) |        |                  |
| Healthcare workers         |        |                  | 1      |                  |        |                  |
| Personal infection         |        |                  |        |                  |        |                  |
| Confirmed                  | 0.625  | 0.85(0.45, 1.63) | 0.816  | 0.92(0.47, 1.80) |        |                  |
| Suspected                  | 0.167  | 2.04(0.74, 5.63) | 0.528  | 1.45(0.46, 4.58) |        |                  |
| Quarantine                 | 0.019  | 2.63(1.17, 5.89) | 0.001  | 3.76(1.69, 8.32) |        |                  |
| Close contactor            | 0.541  | 0.76(0.32, 1.82) | 0.334  | 1.53(0.64, 3.65) |        |                  |

No

1

1
